# Supplementary material for: Experimental petrology constraints on kamafugitic magmas
Source: Copernicus journal article supplement (doi:10.5194/ejm-36-899-2024), 2024-10-09
Supplement: Supplementary file 1 [file ejm-36-899-2024-supplement.zip]

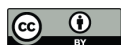

*Supplement of*

## **Experimental petrology constraints on kamafugitic magmas**

**Francesca Innocenzi et al.**

*Correspondence to:* Francesca Innocenzi ([francesca.innocenzi@uniroma1.it](mailto:francesca.innocenzi@uniroma1.it))

- [ejm-36-899-2024-supplement-title-page.pdf](#)
- [Supplement\\_Innocenzi et al..xlsx](#)

The copyright of individual parts of the supplement might differ from the article licence.
